# Supplementary material
Source: PubMed Central journal article supplement (PMC2538810)
Supplement: 2008.154609_1.pdf [file 2008.154609_1.pdf]

**Supplemental Movie 1.** Time-lapse movie generated using 390 DIC images of an isolated RGC, after 7 days in culture, that had been exposed to 20  $\mu\text{M}$  glutamate plus 10  $\mu\text{M}$  glycine for 4.25 hours. The images were collected every 40 s, with the first 6 images captured prior to glutamate entering the microscope chamber. Select images from this video at different time-points are shown in Figure 8 H.
